# Supplementary material for: CD8+ regulatory T cells are critical in prevention of autoimmune-mediated diabetes
Source: PubMed Central journal article supplement (PMC7176710; doi:10.1038/s41467-020-15857-x), 2020-04-22
Supplement: 41467_2020_15857_MOESM1_ESM.pdf [file 41467_2020_15857_MOESM1_ESM.pdf]

CD8<sup>+</sup> regulatory T cells play a critical role in prevention of autoimmune-mediated diabetes

Shimokawa et al.

## Supplementary Figure 1

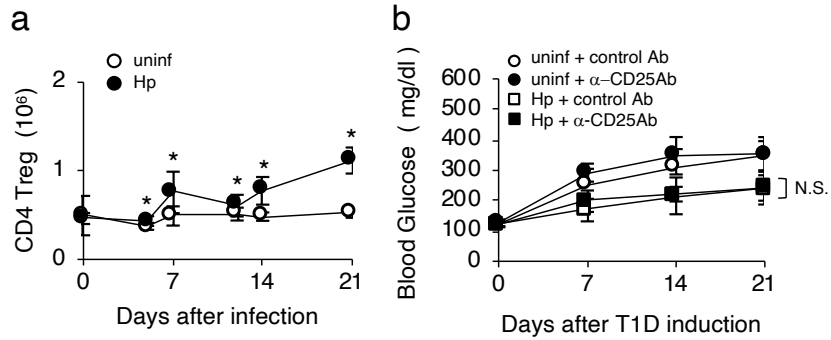

### Supplementary Figure 1. No significant role of CD4Tregs in suppression of T1D in mice infected with Hp.

(a) Absolute numbers of splenic CD4Tregs defined as CD4<sup>+</sup>CD25<sup>+</sup>Foxp3<sup>+</sup> cells were calculated based on flow cytometric analyses. (b) Hp-infected mice depleted of CD4Tregs by administration of an anti-CD25 antibody were used for induction of T1D. Blood glucose concentrations were monitored as described in Fig. 1a. Values represent the mean  $\pm$  S.D. of 10 mice. Asterisks denote statistical significance at  $p < 0.05$  calculated by two-way ANOVA. NS indicates non-significant. All experiments were repeated at least three times with similar results.

Supplementary Figure 2

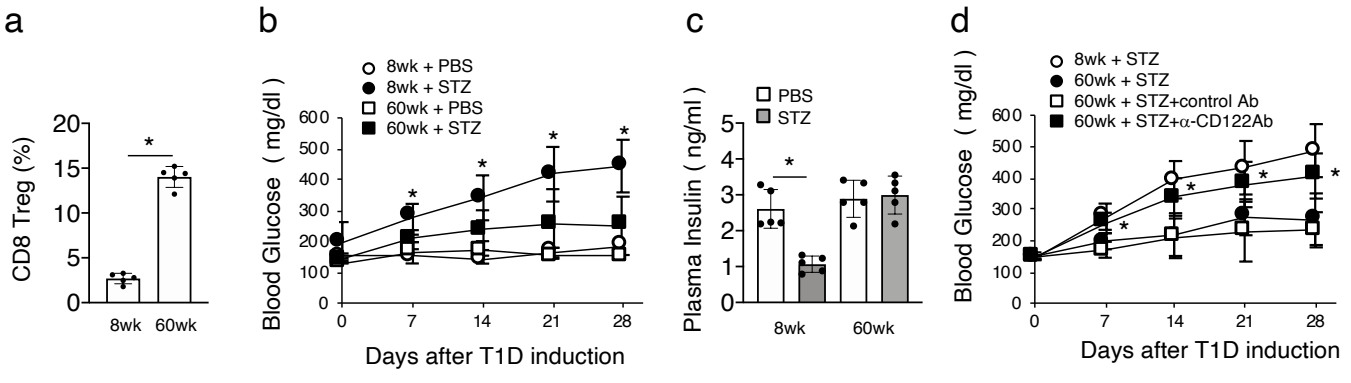

**Supplementary Figure 2. Resistance to induction of T1D of aged mice.** (a) Splenic CD8Tregs in 8- and 60-week-old mice were analysed as described in Fig. 1d, and the frequency is shown. Mice were treated with STZ, and blood glucose concentrations (b) and plasma insulin (c) were measured as described in Fig. 1a, b. (d) Sixty-week-old mice depleted of CD8Tregs were used for T1D induction, and blood glucose concentrations were monitored. Values represent the mean ± S.D. of 10 mice. Asterisks denote statistical significance at p < 0.05 calculated by the two-sided unpaired Student's *t*-test(a), the two-way ANOVA (b, d) Tukey post-hoc analysis (c). NS indicates non-significant. All experiments were repeated four times with similar results.

## Supplementary Figure 3

a

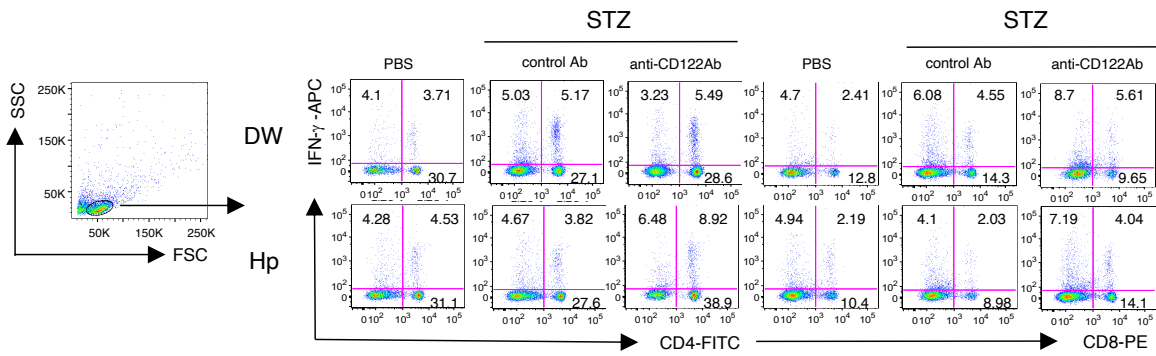

b

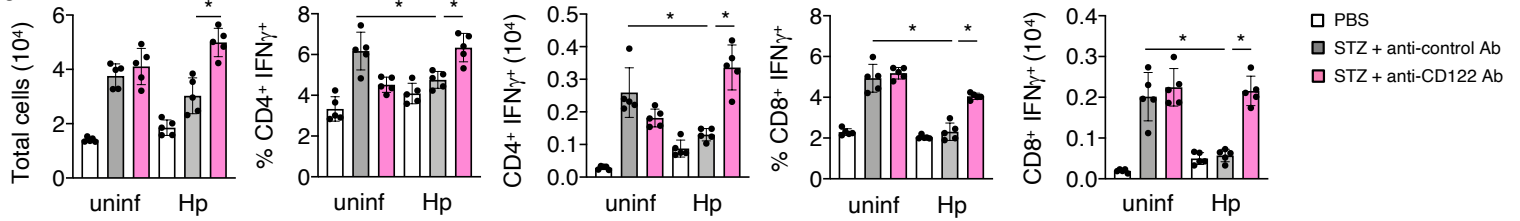

**Supplementary Figure 3. *In situ* uppression of IFN- $\gamma$ -producing T cells in CD8<sup>+</sup> Treg cells-dependent manner during Hp infection.** (a) Pancreatic mononuclear cells isolated from the indicated mice were analysed for production of IFN- $\gamma$  after stimulation with a plate-bound anti-CD3 antibody by flow cytometry. (b) Numbers of total recovered cells, and the frequency and number of IFN- $\gamma$ -producing CD4<sup>+</sup> and CD8<sup>+</sup> T cells are calculated. Values represent the mean  $\pm$  SD from 5 mice. Asterisks denote statistical significance at  $p < 0.05$  calculated by the Tukey post-hoc analysis. All experiments were repeated at least three times with similar results.

# Supplementary Figure 4

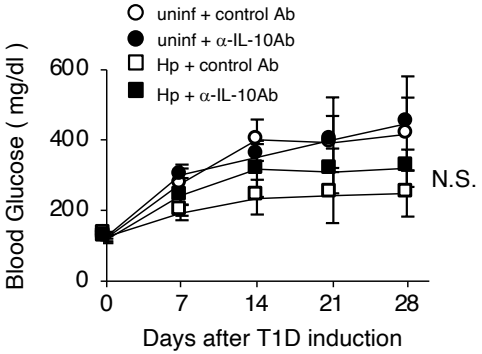

**Supplementary Figure 4. Partial contribution of IL-10 to prevention of T1D in Hp-infected mice.** Blood glucose levels were monitored in Hp-infected mice administered an anti-IL-10 antibody. Values represent the mean  $\pm$  SD of 10 mice. NS indicates non-significant using two-way ANOVA . All experiments were repeated two times with similar results.

## Supplementary Figure 5

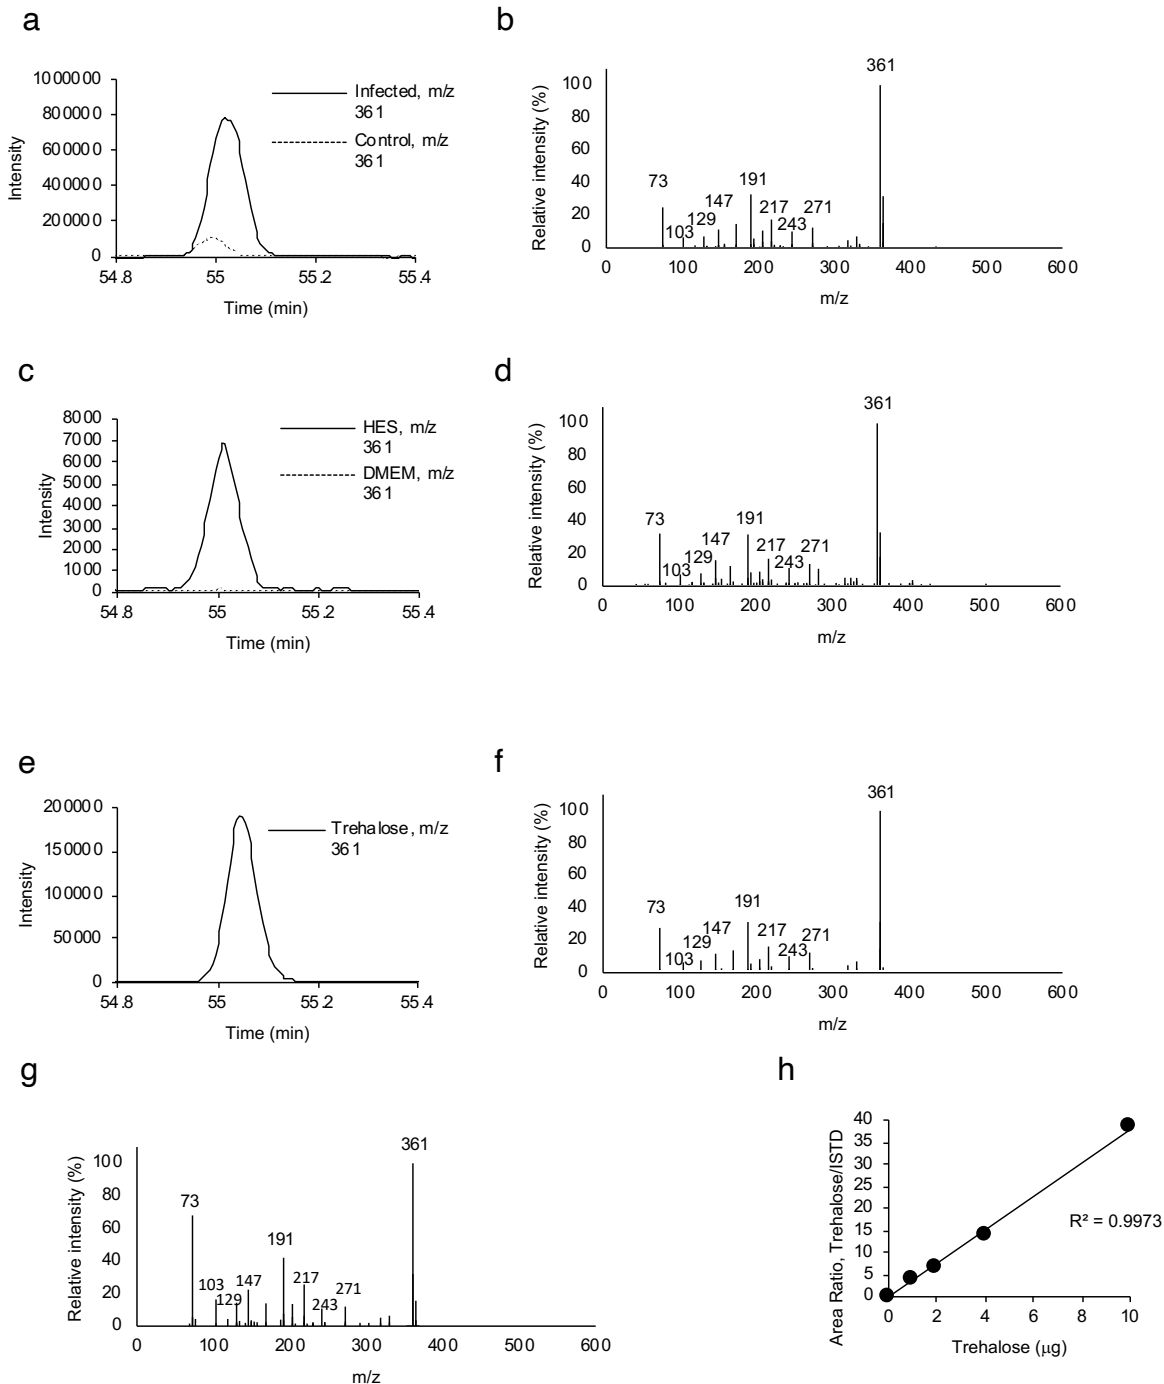

**Supplementary Figure 5. Identification of trehalose in the intestinal contents and among HES antigens.** Intestinal contents of infected and control mice (**a**), HES antigens, DMEM (**c**), and 50 ng trehalose (**e**) were analysed using the GC/MS full-scan mode ( $m/z$  45 - 600) without methoximation. Representative mass chromatograms ( $m/z$  361) showed that a compound equivalent to the peak was increased in mice infected with Hp and in HES antigens. A mass chromatogram ( $m/z$  361) showed that the retention times were very similar among **a**, **c**, and **e**, and the mass spectrum of the peak corresponding to the infected sample in **a** (**b**) and to HES antigens in **c** (**d**) had high similarity to that of trehalose (**f**), suggesting that these peaks were derived from trehalose. (**g**) Standard mass spectrum of trehalose-8TMS collected in the spectrum library of the GCMS solution based on NIST11. (**h**) Trehalose was analysed using the GC/MS MRM mode ( $m/z$  361 > 73) without methoximation. 2-IPM (0.5  $\mu\text{g}$ ) was used for the internal standard. All experiments were repeated two times with similar results.

## Supplementary Figure 6

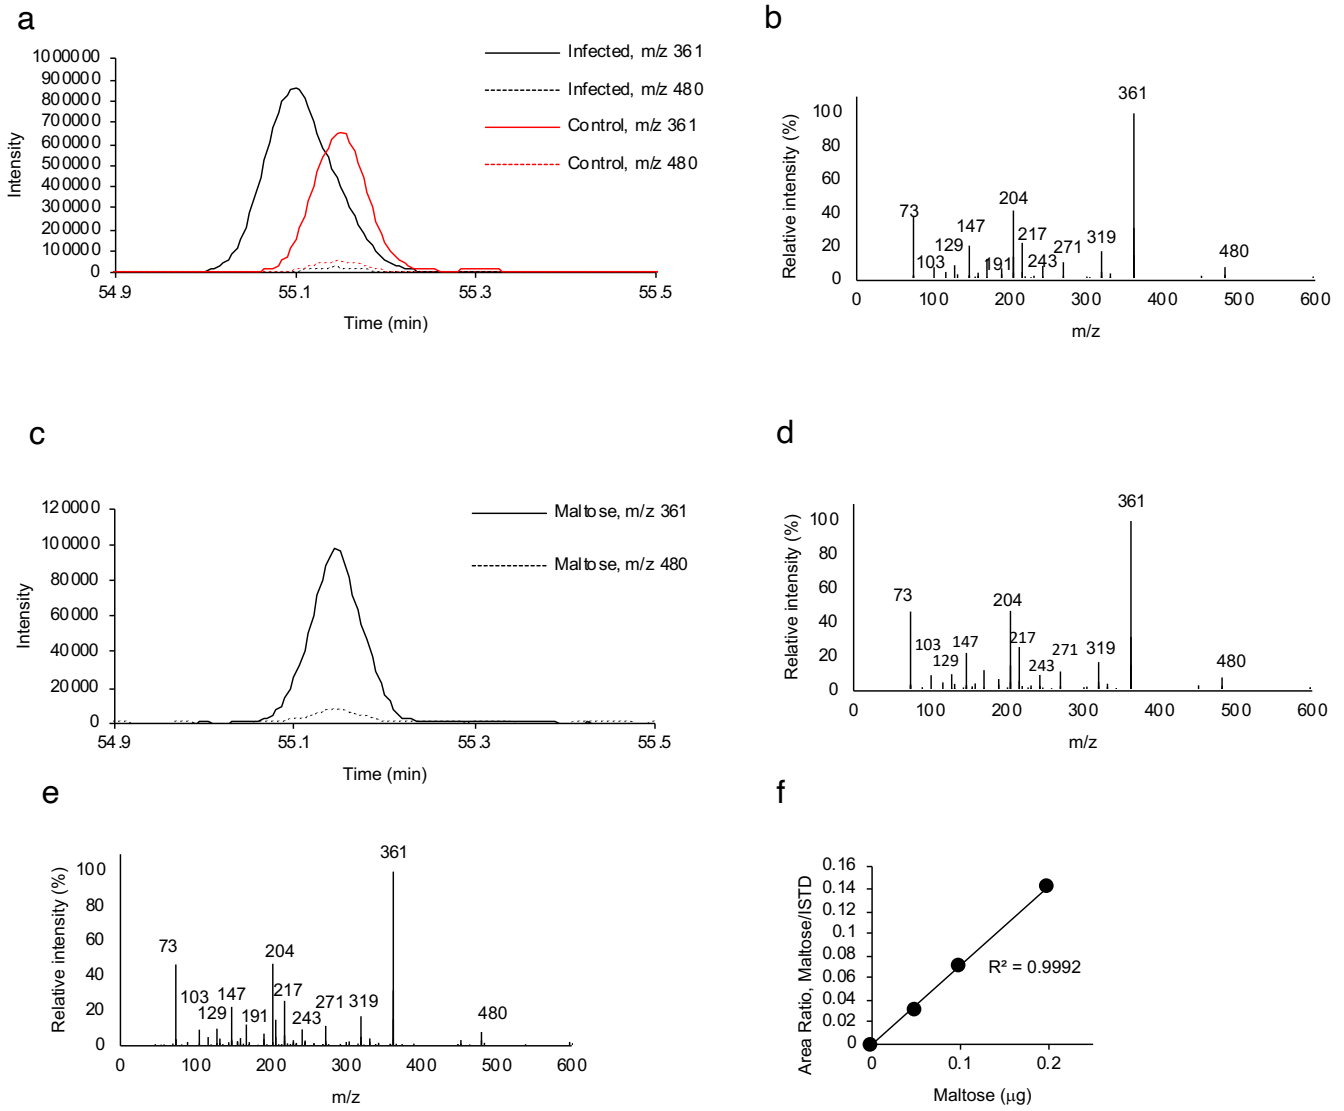

**Supplementary Figure 6. Chromatographic and mass spectrometric distinction of maltose from trehalose.** Intestinal contents of infected and control mice (**a**), and 500 ng maltose (**c**) were analysed using the GC/MS full-scan mode ( $m/z$  45 - 600) with methoximation. Representative mass chromatograms ( $m/z$  361 and 480) of an infected sample indicated that at least two compounds were present. It was likely that the peak at 55.100 min was derived from trehalose (**Supplementary Fig. 5**). However, the peak at 55.150 in the control sample was dominant in the control sample and not in the infected sample. (**b**) Mass spectrum of the peak corresponding to the control sample in **a** had high similarity with that of methoximated maltose (**d**). Mass chromatogram ( $m/z$  361) showed that the retention times were very similar among **a** and **c**, suggesting that the peak at 55.150 min in (**a**) was derived from maltose. (**d**) Mass spectrum of the peak in (**c**) had a distinctive fragment ion of  $m/z$  480, which was not present in the mass spectrum of trehalose. (**e**) Standard mass spectrum of methoximated maltose collected in the spectrum library of the GCMS solution based on NIST11. (**f**) Maltose was analysed using the GC/MS full-scan mode with methoximation. The fragment ion  $m/z$  480 specific for maltose was used for the quantification. 2-IPM ( $0.5 \mu\text{g}$ ) was used for the internal standard. All experiments were repeated two times with similar results.

## Supplementary Figure 7

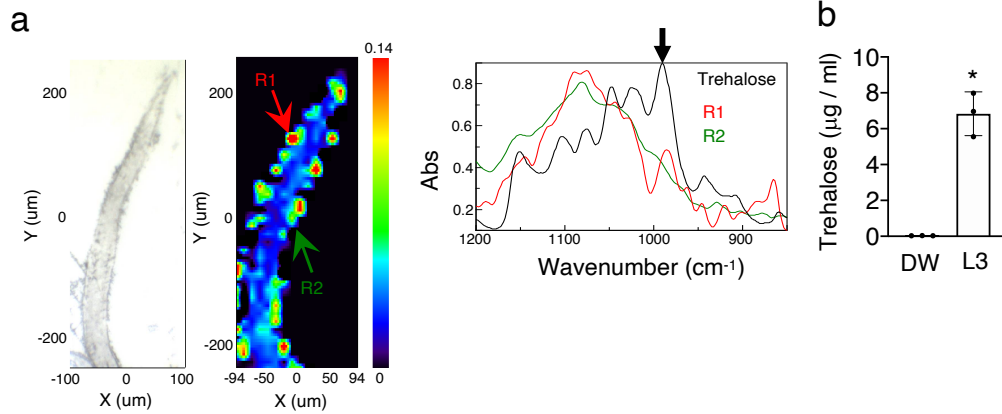

### Supplementary Figure 7. Secretion of trehalose from infective L3 larvae of Hp.

(a) As indicated in the spectrum of pure trehalose crystals (black line in the right panel), this sugar had a unique vibration band at  $992\text{ cm}^{-1}$  (arrow), which reflected an  $\alpha, \alpha\text{-}1, 1$  bond between two glucose molecules. FTIR microscopic observations using this peak were performed to visualize the location of trehalose in L3 larvae. The resulting FTIR image is shown in the centre panel together with the corresponding bright field image (left panel). The image size is approximately  $200\text{ }\mu\text{m}$  wide and  $500\text{ }\mu\text{m}$  long. The peak intensity at  $992\text{ cm}^{-1}$  was expressed along with the colour scale from the darkest red to the lightest violet. The concentrated trehalose regions were located along the surface of the worm body. The FTIR spectra of R1 and R2 regions in the FTIR image are shown in the right panel. The spectrum of the R1 region exhibited a distinct peak at  $992\text{ cm}^{-1}$ , which confirmed the existence of trehalose. (b) Trehalose concentrations in the preservative solution in the absence (DW) or presence of 200 L3 larvae/ml were measured using a trehalose assay kit. Values represent the mean  $\pm$  SD from triplicate cultures. Asterisks denote statistical significance at  $p < 0.01$  calculated by the two-tailed Mann-Whitney test. FTIR observation was performed once and trehalose concentrations were measured three times with similar results.



## Supplementary Figure 8

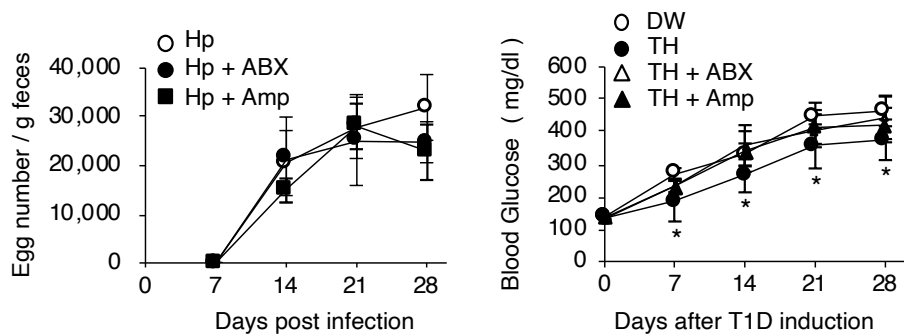

**Supplementary Figure 8. No adverse effects of antibiotics on Hp infection.** Kinetics of Hp infection in mice treated with ABX or Amp were monitored by counting eggs in faeces. Values represent the mean  $\pm$  SD of 10 mice. Asterisks denote statistical significance at  $p < 0.05$  calculated by the two-way ANOVA. All experiments were repeated at least three times with similar results.

## Supplementary Figure 9

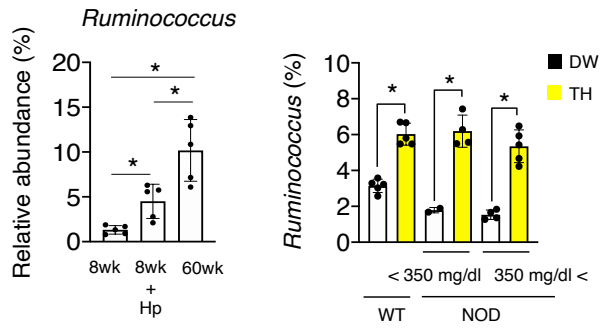

**Supplementary Figure 9. Abundance of *Ruminococcus* in aged C57BL/6 and NOD mice.** Abundance of *Ruminococcus* in aged mice (N=5) and NOD mice used in Fig. 2I was evaluated as described in Fig. 3f. Values represent the mean  $\pm$  SD. Asterisks denote statistical significance at  $p < 0.05$  calculated by the Tukey post-hoc analysis. Experiments using aged mice were repeated at least three times with similar results and those using NOD mice were performed once.

## Supplementary Figure 10

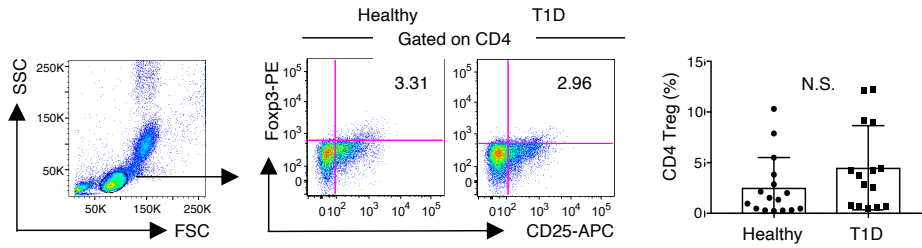

**Supplementary Figure 10. CD4Tregs in T1D patients.** Cells from T1D patients (N=15) and healthy volunteers (N=15) used in **Fig. 4** were also analysed for CD4Tregs. The gated CD4<sup>+</sup> cells were plotted onto CD25 and FcγR3 (left panels). The numbers indicate the percentages of CD25<sup>+</sup>FcγR3<sup>+</sup> CD4Tregs among the gated CD4<sup>+</sup> cells. The frequency of CD4Tregs is presented as described in **Figure 4b** (right panels). Values represent the mean  $\pm$  SD. NS indicates non-significant using the two-sided unpaired Student's *t*-test. All experiments using human samples were performed once.

Supplementary Figure 11

Figure 1d

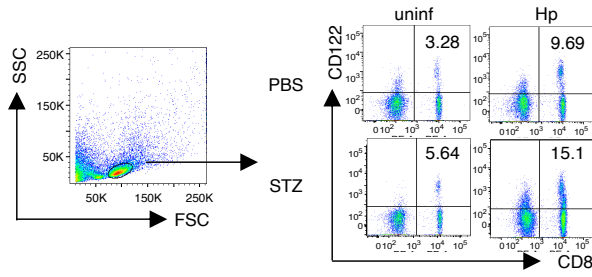

Figure 1f

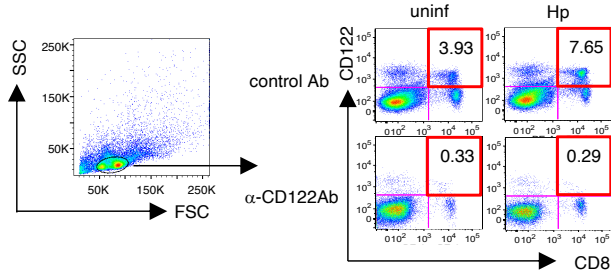

Figure 3a

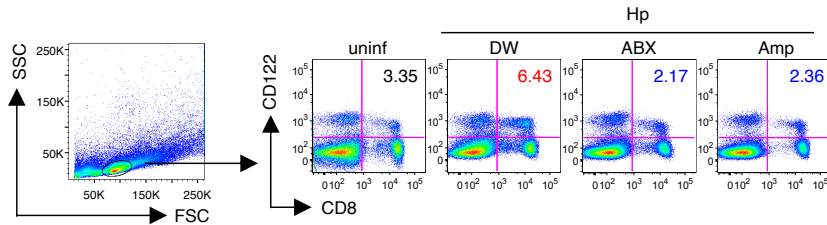

Figure 3j

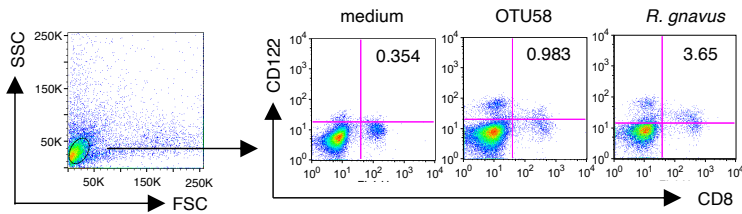

Supplementary Figure 11 Gating strategies for Fig. 1d, f, and Fig. 3a, j are shown.

Supplementary Table 1: Metabolites identified in the intestinal contents

|    | Metabolite name           | Average normalized area (5 controls) | Average normalized area (4 infected) | Area ratio (Infected/Control) | <i>p</i> value | Bonferroni ( <i>p</i> < 0.001) | log <sub>2</sub> (FC) | -log <sub>10</sub> ( <i>p</i> ) | * <i>p</i> , BH | transition (m/z) | %CV (QC) | RT (min) | ΔRT(min) |
|----|---------------------------|--------------------------------------|--------------------------------------|-------------------------------|----------------|--------------------------------|-----------------------|---------------------------------|-----------------|------------------|----------|----------|----------|
| 1  | Trehalose-8TMS            | 4,140                                | 73,778                               | 17.82                         | 3.2E-04        | significant                    | 4.16                  | 3.49                            | * 0.015         | 361.10>73.00     | 4.39     | 55.03    | 0.099    |
| 2  | Asparagine-3TMS           | 928                                  | 2,605                                | 2.81                          | 2.6E-03        |                                | 1.49                  | 2.58                            | * 0.062         | 188.10>73.00     | 6.40     | 29.89    | 0.059    |
| 3  | Glycerol 3-phosphate-4TMS | 2,024                                | 11,616                               | 5.74                          | 7.1E-02        |                                | 2.52                  | 1.15                            | 1.13            | 357.10>73.00     | 5.69     | 32.57    | 0.047    |
| 4  | 5-Aminovaleric acid-3TMS  | 751                                  | 1,305                                | 1.74                          | 9.9E-02        |                                | 0.80                  | 1.00                            | 1.19            | 174.20>73.00     | 7.20     | 28.65    | 0.091    |
| 5  | Ascorbic acid-4TMS        | 70                                   | 1,544                                | 22.15                         | 0.1129         |                                | 4.47                  | 0.95                            | 1.08            | 319.10>73.00     | 2.95     | 37.59    | 0.122    |
| 6  | 2-Aminoethanol-3TMS       | 712                                  | 1,515                                | 2.13                          | 0.1792         |                                | 1.09                  | 0.75                            | 1.43            | 174.10>73.00     | 17.98    | 16.99    | 0.075    |
| 7  | Mannitol-6TMS             | 45,419                               | 4,728                                | 0.10                          | 0.1792         |                                | -3.26                 | 0.75                            | 1.23            | 319.20>73.00     | 2.13     | 37.39    | 0.093    |
| 8  | 4-Aminobutyric acid-3TMS  | 543                                  | 1,295                                | 2.39                          | 0.2485         |                                | 1.25                  | 0.60                            | 1.49            | 174.10>73.00     | 8.28     | 25.71    | 0.081    |
| 9  | Glycine-2TMS              | 1,338                                | 370                                  | 0.28                          | 0.2776         |                                | -1.86                 | 0.56                            | 1.48            | 176.10>147.10    | 28.85    | 11.59    | 0.098    |
| 10 | Phosphoric acid-3TMS      | 33,525                               | 69,766                               | 2.08                          | 0.2801         |                                | 1.06                  | 0.55                            | 1.34            | 299.10>73.00     | 1.35     | 17.16    | 0.118    |
| 11 | Isoleucine-2TMS           | 36,259                               | 16,779                               | 0.46                          | 0.2890         |                                | -1.11                 | 0.54                            | 1.26            | 158.20>73.00     | 0.94     | 17.89    | 0.124    |
| 12 | Creatinine-3TMS           | 342                                  | 604                                  | 1.77                          | 0.2912         |                                | 0.82                  | 0.54                            | 1.16            | 329.20>115.10    | 1.53     | 26.71    | 0.094    |
| 13 | Taurine-3TMS              | 2,182                                | 277                                  | 0.13                          | 0.3015         |                                | -2.98                 | 0.52                            | 1.11            | 174.10>73.00     | 22.74    | 30.05    | 0.104    |
| 14 | Leucine-2TMS              | 102,601                              | 52,331                               | 0.51                          | 0.3084         |                                | -0.97                 | 0.51                            | 1.06            | 158.10>73.00     | 2.16     | 17.09    | 0.120    |

|    |                    |         |        |      |        |  |       |      |      |               |       |       |       |
|----|--------------------|---------|--------|------|--------|--|-------|------|------|---------------|-------|-------|-------|
| 15 | Valine-2TMS        | 49,342  | 25,724 | 0.52 | 0.3284 |  | -0.94 | 0.48 | 1.05 | 144.10>73.00  | 1.28  | 15.14 | 0.107 |
| 16 | Histidine-3TMS     | 13,250  | 6,384  | 0.48 | 0.3665 |  | -1.05 | 0.44 | 1.10 | 154.10>73.00  | 10.61 | 36.77 | 0.092 |
| 17 | Phenylalanine-2TMS | 45,978  | 27,340 | 0.59 | 0.4088 |  | -0.75 | 0.39 | 1.15 | 218.10>73.00  | 1.67  | 28.74 | 0.064 |
| 18 | Glutamine-3TMS     | 6,552   | 9,344  | 1.43 | 0.4128 |  | 0.51  | 0.38 | 1.10 | 245.10>156.10 | 9.06  | 32.73 | 0.086 |
| 19 | Ornithine-3TMS     | 8,837   | 4,889  | 0.55 | 0.4400 |  | -0.85 | 0.36 | 1.11 | 142.10>73.00  | 15.82 | 28.20 | 0.090 |
| 20 | Tyrosine-3TMS      | 117,126 | 75,282 | 0.64 | 0.4807 |  | -0.64 | 0.32 | 1.15 | 218.10>73.00  | 1.30  | 37.20 | 0.089 |
| 21 | Sorbitol-6TMS      | 4,195   | 2,446  | 0.58 | 0.4866 |  | -0.78 | 0.31 | 1.11 | 203.10>73.00  | 3.10  | 37.67 | 0.068 |
| 22 | Tryptophan-3TMS    | 46,086  | 30,628 | 0.66 | 0.4935 |  | -0.59 | 0.31 | 1.08 | 202.10>73.00  | 1.97  | 44.03 | 0.091 |
| 23 | Stearic acid-TMS   | 19,004  | 23,478 | 1.24 | 0.4981 |  | 0.30  | 0.30 | 1.04 | 145.10>129.10 | 4.22  | 43.89 | 0.073 |
| 24 | Aspartic acid-3TMS | 39,783  | 25,286 | 0.64 | 0.5142 |  | -0.65 | 0.29 | 1.03 | 232.10>73.00  | 1.12  | 25.35 | 0.072 |
| 25 | Serine-3TMS        | 20,517  | 14,261 | 0.70 | 0.5215 |  | -0.52 | 0.28 | 1.00 | 204.10>73.00  | 1.46  | 20.16 | 0.064 |
| 26 | Lactic acid-2TMS   | 49,206  | 85,170 | 1.73 | 0.5437 |  | 0.79  | 0.26 | 1.00 | 191.10>147.10 | 3.63  | 9.59  | 0.101 |
| 27 | Proline-2TMS       | 12,459  | 9,026  | 0.72 | 0.5446 |  | -0.46 | 0.26 | 0.97 | 142.10>73.00  | 4.11  | 18.09 | 0.092 |
| 28 | Glutamic acid-3TMS | 23,870  | 16,698 | 0.70 | 0.5560 |  | -0.52 | 0.25 | 0.95 | 246.10>73.00  | 2.20  | 28.32 | 0.082 |
| 29 | Palmitic acid-TMS  | 9,890   | 11,789 | 1.19 | 0.5691 |  | 0.25  | 0.24 | 0.94 | 313.30>75.10  | 5.48  | 39.37 | 0.063 |
| 30 | Arginine-3TMS      | 2,153   | 1,566  | 0.73 | 0.5964 |  | -0.46 | 0.22 | 0.95 | 142.10>73.00  | 6.88  | 34.08 | 0.090 |
| 31 | Glyceric acid-3TMS | 1,235   | 878    | 0.71 | 0.6011 |  | -0.49 | 0.22 | 0.93 | 189.10>73.00  | 1.76  | 19.14 | 0.145 |
| 32 | Threonine-3TMS     | 7,249   | 5,503  | 0.76 | 0.6102 |  | -0.40 | 0.21 | 0.92 | 218.10>73.00  | 1.11  | 21.11 | 0.082 |
| 33 | Fumaric acid-2TMS  | 537     | 701    | 1.30 | 0.6284 |  | 0.38  | 0.20 | 0.91 | 241.10>147.10 | 2.18  | 19.41 | 0.112 |
| 34 | Sucrose-8TMS       | 18,149  | 28,649 | 1.58 | 0.6374 |  | 0.66  | 0.20 | 0.90 | 361.10>73.00  | 7.58  | 53.04 | 0.154 |
| 35 | 5-Oxoproline-2TMS  | 101,934 | 75,939 | 0.74 | 0.7049 |  | -0.42 | 0.15 | 0.97 | 156.10>73.00  | 3.98  | 25.51 | 0.070 |
| 36 | Glycine-3TMS       | 3,919   | 4,576  | 1.17 | 0.7272 |  | 0.22  | 0.14 | 0.97 | 174.10>73.00  | 5.27  | 18.42 | 0.100 |

|    |                    |        |        |      |        |  |       |      |      |               |       |       |       |
|----|--------------------|--------|--------|------|--------|--|-------|------|------|---------------|-------|-------|-------|
| 37 | Hypoxanthine-2TMS  | 1,436  | 1,151  | 0.80 | 0.7405 |  | -0.32 | 0.13 | 0.96 | 265.10>73.00  | 1.68  | 33.70 | 0.106 |
| 38 | Niacinamide-TMS    | 433    | 541    | 1.25 | 0.7534 |  | 0.32  | 0.12 | 0.95 | 179.10>75.00  | 1.42  | 24.00 | 0.086 |
| 39 | Lysine-4TMS        | 5,361  | 6,116  | 1.14 | 0.7645 |  | 0.19  | 0.12 | 0.94 | 317.20>156.20 | 11.04 | 36.72 | 0.095 |
| 40 | Alanine-2TMS       | 76,523 | 66,099 | 0.86 | 0.7882 |  | -0.21 | 0.10 | 0.95 | 116.10>73.00  | 2.35  | 11.07 | 0.092 |
| 41 | Ornithine-4TMS     | 4,530  | 4,013  | 0.89 | 0.8539 |  | -0.17 | 0.07 | 1.00 | 157.20>73.00  | 9.06  | 34.10 | 0.070 |
| 42 | Adenosine-4TMS     | 2,397  | 2,088  | 0.87 | 0.8734 |  | -0.20 | 0.06 | 1.00 | 230.10>73.00  | 4.81  | 52.46 | 0.087 |
| 43 | Cysteine-3TMS      | 5,080  | 5,479  | 1.08 | 0.8789 |  | 0.11  | 0.06 | 0.98 | 220.10>73.00  | 10.26 | 26.52 | 0.096 |
| 44 | Uracil-2TMS        | 684    | 630    | 0.92 | 0.8871 |  | -0.12 | 0.05 | 0.97 | 245.00>147.10 | 1.56  | 19.44 | 0.051 |
| 45 | Succinic acid-2TMS | 1,106  | 1,020  | 0.92 | 0.8887 |  | -0.12 | 0.05 | 0.95 | 247.10>147.10 | 0.81  | 18.36 | 0.052 |
| 46 | Glycerol-3TMS      | 3,521  | 3,705  | 1.05 | 0.9286 |  | 0.07  | 0.03 | 0.97 | 133.10>73.00  | 2.85  | 17.14 | 0.108 |
| 47 | Xanthine-3TMS      | 914    | 884    | 0.97 | 0.9626 |  | -0.05 | 0.02 | 0.98 | 353.10>147.10 | 3.21  | 39.21 | 0.081 |
| 48 | Inosine-4TMS       | 842    | 846    | 1.01 | 0.9937 |  | 0.01  | 0.00 | 0.99 | 259.10>73.00  | 4.44  | 51.25 | 0.085 |

#### Supplementary table 1

Metabolites in the intestinal contents (5 controls and 4 infected) were analyzed using GC/MS MRM mode. Forty-eight metabolites were identified manually using GC/MS solution software version 4.41 (Shimadzu). Each area of metabolite was normalized by the area of 2-IPM and the weight of intestinal content. Intra-assay variability was examined by peak areas of 2-IPM in all the measurements. Its %CV value was 8.9%, which showed the measurement was stable. The *p* values were calculated with the two-tailed unpaired Student's t-test. Metabolites were sorted according to the *p* values. Among the 48 metabolites, only the trehalose level was significantly high in the infected group with the significance level of 0.05 when it was adjusted with Bonferroni's method ( $p < 0.001$ ). When false discovery rate (FDR) was considered using Benjamini and Hochberg (BH) method, the asparagine level, in addition to trehalose, was also

significantly high in the infected group with FDR 0.1, which was shown as asterisks.

Intra-assay variability was also examined using quality control (QC) samples. The QC sample that was prepared by mixing all the target samples ( $n = 9$ ) was processed in the same way as the target samples. Four independent measurements were done for the QC samples. Concerning the QC measurements, the %CV values of peak areas that were normalized by the areas of 2-IPM, indicated that the measurement was stable enough for most of the metabolites.

All the retention times for the identified metabolites were close to the set values.



Supplementary Table 2: Metabolites identified in the HES/DEMEM

|    | Metabolite name              | Average normalized area (DEMEM) | Average normalized area (HES) | Area ratio (HES/Cont) | <i>p</i> value | Bonferroni ( <i>p</i> < 0.0015) | log <sub>2</sub> (FC) | -log <sub>10</sub> ( <i>p</i> ) | * <i>p</i> , BH | transition (m/z) | %CV (QC) | RT (min) | Δ RT(min) |
|----|------------------------------|---------------------------------|-------------------------------|-----------------------|----------------|---------------------------------|-----------------------|---------------------------------|-----------------|------------------|----------|----------|-----------|
| 1  | Trehalose-8TMS               | 365                             | 65,149                        | 178.52                | 1.6E-06        | significant                     | 7.48                  | 5.80                            | * 5.2E-05       | 361.10>73.00     | 3.19     | 55.04    | 0.095     |
| 2  | Succinic acid-2TMS           | 1,006                           | 8,474                         | 8.43                  | 4.8E-06        | significant                     | 3.08                  | 5.32                            | * 7.9E-05       | 247.10>147.10    | 3.35     | 18.36    | 0.051     |
| 3  | Hydroquinone-2TMS            | 12,410                          | 14,557                        | 1.17                  | 5.1E-04        | significant                     | 0.23                  | 3.30                            | * 5.6E-03       | 254.10>239.10    | 1.06     | 21.49    | 0.091     |
| 4  | Lactic acid-2TMS             | 84,537                          | 283,657                       | 3.36                  | 1.7E-03        |                                 | 1.75                  | 2.78                            | * 0.014         | 191.10>147.10    | 13.04    | 9.59     | 0.100     |
| 5  | 3-Hydroxypropionic acid-2TMS | 2,135                           | 2,654                         | 1.24                  | 0.0023         |                                 | 0.31                  | 2.64                            | * 0.015         | 177.10>147.10    | 3.02     | 12.43    | 0.104     |
| 6  | Alanine-2TMS                 | 8,116                           | 45,752                        | 5.64                  | 0.0056         |                                 | 2.49                  | 2.25                            | * 0.031         | 116.10>73.00     | 21.42    | 11.07    | 0.092     |
| 7  | Proline-2TMS                 | 834                             | 12,888                        | 15.45                 | 0.0076         |                                 | 3.95                  | 2.12                            | * 0.036         | 142.10>73.00     | 26.58    | 18.09    | 0.092     |
| 8  | Glyceric acid-3TMS           | 7,910                           | 9,378                         | 1.19                  | 0.0083         |                                 | 0.25                  | 2.08                            | * 0.034         | 189.10>73.00     | 3.33     | 19.14    | 0.145     |
| 9  | Phenylacetic acid-TMS        | 4,587                           | 5,132                         | 1.12                  | 0.0293         |                                 | 0.16                  | 1.53                            | 0.11            | 164.10>73.00     | 2.22     | 17.99    | 0.060     |
| 10 | Nonanoic acid-TMS            | 27,605                          | 30,075                        | 1.09                  | 0.1594         |                                 | 0.12                  | 0.80                            | 0.53            | 215.10>75.00     | 6.04     | 19.91    | 0.015     |
| 11 | Niacinamide-TMS              | 27,346                          | 25,887                        | 0.95                  | 0.2247         |                                 | -0.08                 | 0.65                            | 0.67            | 179.10>75.00     | 4.08     | 24.00    | 0.088     |
| 12 | Glycolic acid-2TMS           | 7,578                           | 8,262                         | 1.09                  | 0.2547         |                                 | 0.12                  | 0.59                            | 0.70            | 177.10>147.10    | 3.70     | 10.05    | 0.065     |
| 13 | Phosphoric acid-3TMS         | 68,012                          | 70,028                        | 1.03                  | 0.3464         |                                 | 0.04                  | 0.46                            | 0.88            | 299.10>73.00     | 2.25     | 17.16    | 0.121     |
| 14 | Histidine-3TMS               | 70,994                          | 64,747                        | 0.91                  | 0.3539         |                                 | -0.13                 | 0.45                            | 0.83            | 154.10>73.00     | 8.97     | 36.77    | 0.095     |
| 15 | Methionine-2TMS              | 4,502                           | 4,868                         | 1.08                  | 0.3878         |                                 | 0.11                  | 0.41                            | 0.85            | 250.10>147.10    | 9.71     | 25.37    | 0.083     |
| 16 | Tyrosine-3TMS                | 1,313,551                       | 1,262,184                     | 0.96                  | 0.4021         |                                 | -0.06                 | 0.40                            | 0.83            | 218.10>73.00     | 5.06     | 37.20    | 0.093     |

|    |                       |            |            |      |        |  |       |      |      |               |       |       |       |
|----|-----------------------|------------|------------|------|--------|--|-------|------|------|---------------|-------|-------|-------|
| 17 | Octadecanol-TMS       | 6,545      | 7,583      | 1.16 | 0.4315 |  | 0.21  | 0.37 | 0.84 | 327.30>75.00  | 21.06 | 41.92 | 0.073 |
| 18 | Tryptophan-3TMS       | 278,796    | 251,759    | 0.90 | 0.4520 |  | -0.15 | 0.34 | 0.83 | 202.10>73.00  | 12.57 | 44.02 | 0.096 |
| 19 | Valine-2TMS           | 1,647,087  | 1,456,075  | 0.88 | 0.4643 |  | -0.18 | 0.33 | 0.81 | 144.10>73.00  | 17.82 | 15.14 | 0.105 |
| 20 | Phenylalanine-2TMS    | 478,821    | 455,954    | 0.95 | 0.4838 |  | -0.07 | 0.32 | 0.80 | 218.10>73.00  | 7.60  | 28.74 | 0.066 |
| 21 | 5-Oxoproline-2TMS     | 14,809,609 | 14,113,417 | 0.95 | 0.4873 |  | -0.07 | 0.31 | 0.77 | 156.10>73.00  | 6.65  | 25.51 | 0.070 |
| 22 | Isoleucine-2TMS       | 1,547,361  | 1,400,300  | 0.90 | 0.5228 |  | -0.14 | 0.28 | 0.78 | 158.20>73.00  | 16.82 | 17.89 | 0.123 |
| 23 | Leucine-2TMS          | 1,870,530  | 1,653,445  | 0.88 | 0.5273 |  | -0.18 | 0.28 | 0.76 | 158.10>73.00  | 20.71 | 17.09 | 0.119 |
| 24 | Arginine-3TMS         | 10,651     | 8,865      | 0.83 | 0.6054 |  | -0.26 | 0.22 | 0.83 | 157.20>73.00  | 11.87 | 34.10 | 0.072 |
| 25 | Caproic acid-TMS      | 5,379      | 5,043      | 0.94 | 0.6191 |  | -0.09 | 0.21 | 0.82 | 173.10>75.00  | 10.47 | 9.93  | 0.087 |
| 26 | Threonine-3TMS        | 290,525    | 272,279    | 0.94 | 0.6437 |  | -0.09 | 0.19 | 0.82 | 218.10>73.00  | 14.90 | 21.11 | 0.083 |
| 27 | Glutamine-3TMS        | 52,751     | 50,207     | 0.95 | 0.6523 |  | -0.07 | 0.19 | 0.80 | 245.10>156.10 | 8.77  | 32.73 | 0.088 |
| 28 | Lysine-4TMS           | 39,965     | 35,178     | 0.88 | 0.6575 |  | -0.18 | 0.18 | 0.77 | 317.20>156.20 | 25.09 | 36.72 | 0.099 |
| 29 | Serine-3TMS           | 407,157    | 382,657    | 0.94 | 0.7002 |  | -0.09 | 0.15 | 0.80 | 204.10>73.00  | 17.46 | 20.16 | 0.066 |
| 30 | Glycine-3TMS          | 47,680     | 43,473     | 0.91 | 0.7173 |  | -0.13 | 0.14 | 0.79 | 174.10>73.00  | 20.88 | 18.42 | 0.098 |
| 31 | Benzoic acid-TMS      | 13,663     | 14,217     | 1.04 | 0.7817 |  | 0.06  | 0.11 | 0.83 | 179.10>105.10 | 15.77 | 16.23 | 0.075 |
| 32 | Ornithine-4TMS        | 13,194     | 13,918     | 1.05 | 0.8112 |  | 0.08  | 0.09 | 0.84 | 142.10>73.00  | 18.77 | 34.09 | 0.084 |
| 33 | Pantothenic acid-3TMS | 9,476      | 9,699      | 1.02 | 0.8531 |  | 0.03  | 0.07 | 0.85 | 291.20>201.10 | 8.19  | 38.58 | 0.094 |

Supplementary table 2

Metabolites in HES and DMEM (3 HES and 3 DMEM) were analyzed using GC/MS MRM mode. Thirty-three metabolites were identified manually using GCMS solution software version 4.41 (Shimadzu). Each area of metabolite was normalized by the area of 2-IPM. Intra-assay variability was examined by

peak areas of 2-IPM in all the measurements. Its %CV value was 19%. The  $p$  values were calculated with the two-tailed unpaired Student's  $t$ -test. Metabolites were sorted according to the  $p$  values. Among the 33 metabolites, the levels of three metabolites, trehalose, succinic acid and Hydroquinone, were significantly high in HES group with the significance level of 0.05 when it was adjusted with Bonferroni's method ( $p < 0.0015$ ). When FDR was considered using BH method, 8 metabolites were significantly high in the infected group with FDR 0.1, which was shown as asterisks.

Intra-assay variability was also examined using QC samples. The QC sample that was prepared by mixing HES and DMEM samples was processed in the same way as the target samples. Four independent measurements were done for the QC samples. Concerning the QC measurements, the %CV values of peak areas that were normalized by the areas of 2-IPM, indicated that the measurement was stable enough for most of the metabolites. All the retention times for the identified metabolites were close to the set values.

Supplementary Table 3. Summary of clinical characteristics of the T1D participants and healthy volunteers.

|         | Number | Sex | Age | Duration from onset | Blood sugar (mg/dl) | HbA1c (%) | RBC (10 <sup>6</sup> /ul) | WBC (10 <sup>3</sup> /ul) | Platelet (10 <sup>4</sup> / ul) | Anti-GAD <sup>1</sup> antibody (U/ml) <sup>2,3</sup> | Anti-IA-2 antibody <sup>2,4</sup> | Anti-Insulin Antibody <sup>2,5</sup> | CD8 Treg (%) | CD4 Treg (%) |
|---------|--------|-----|-----|---------------------|---------------------|-----------|---------------------------|---------------------------|---------------------------------|------------------------------------------------------|-----------------------------------|--------------------------------------|--------------|--------------|
| Healthy | 1      | F   | 2   | -                   | -                   | -         | -                         | -                         | -                               | -                                                    | -                                 | -                                    | 1.93         | 2.15         |
|         | 2      | F   | 2   | -                   | -                   | -         | -                         | -                         | -                               | -                                                    | -                                 | -                                    | 1.55         | 0.464        |
|         | 3      | M   | 7   | -                   | -                   | -         | -                         | -                         | -                               | -                                                    | -                                 | -                                    | 3.76         | 0.475        |
|         | 4      | F   | 10  | -                   | -                   | -         | -                         | -                         | -                               | -                                                    | -                                 | -                                    | 6.88         | 0.32         |
|         | 5      | F   | 10  | -                   | -                   | -         | -                         | -                         | -                               | -                                                    | -                                 | -                                    | 4.28         | 0.297        |
|         | 6      | F   | 10  | -                   | -                   | -         | -                         | -                         | -                               | -                                                    | -                                 | -                                    | 3.48         | 0.276        |
|         | 7      | F   | 10  | -                   | -                   | -         | -                         | -                         | -                               | -                                                    | -                                 | -                                    | 2.55         | 0.249        |
|         | 8      | F   | 12  | -                   | -                   | -         | -                         | -                         | -                               | -                                                    | -                                 | -                                    | 11.7         | 2.87         |
|         | 9      | F   | 13  | -                   | -                   | -         | -                         | -                         | -                               | -                                                    | -                                 | -                                    | 5.32         | 1.53         |
|         | 10     | M   | 13  | -                   | -                   | -         | -                         | -                         | -                               | -                                                    | -                                 | -                                    | 4.99         | 1.34         |
|         | 11     | F   | 13  | -                   | -                   | -         | -                         | -                         | -                               | -                                                    | -                                 | -                                    | 4.02         | 0.962        |
|         | 12     | M   | 14  | -                   | -                   | -         | -                         | -                         | -                               | -                                                    | -                                 | -                                    | 2.84         | 10.3         |
|         | 13     | M   | 14  | -                   | -                   | -         | -                         | -                         | -                               | -                                                    | -                                 | -                                    | 5.69         | 7.88         |
|         | 14     | M   | 14  | -                   | -                   | -         | -                         | -                         | -                               | -                                                    | -                                 | -                                    | 6.17         | 5.49         |
|         | 15     | F   | 16  | -                   | -                   | -         | -                         | -                         | -                               | -                                                    | -                                 | -                                    | 7.59         | 3.821        |
|         | 16     | F   | 16  | -                   | -                   | -         | -                         | -                         | -                               | -                                                    | -                                 | -                                    | 13.4         | 2.001        |
| T1D     | 1      | F   | 2   | 0mo                 | 230                 | 7.1       | 448                       | 5.6                       | 29.1                            | 8.2                                                  | -                                 | -                                    | 3.6          | 9.18         |
|         | 2      | F   | 3   | 2yr 11mo            | 157                 | 8.5       | 486                       | 11.3                      | 44.9                            | 26                                                   | -                                 | -                                    | 2.28         | 0.45         |
|         | 3      | F   | 6   | 1yr 4mo             | 112                 | 8.6       | 468                       | 8.6                       | 34.1                            | > 2000                                               | -                                 | -                                    | 2.89         | 4.47         |
|         | 4      | F   | 7   | 1mo                 | 137                 | 10.5      | 461                       | 3.3                       | 21.4                            | 52                                                   | < 0.4                             | < 125                                | 3.19         | 12.1         |
|         | 5      | F   | 9   | 1yr 10mo            | 111                 | 8.7       | 489                       | 4.1                       | 28.2                            | +                                                    | +                                 | -                                    | 3.11         | 8.96         |
|         | 6      | F   | 10  | 1yr 9mo             | 306                 | 7.9       | 494                       | 6.1                       | 27.2                            | 0.5                                                  | < 0.4                             | < 125                                | 2.44         | 0.73         |
|         | 7      | F   | 10  | 7yr 7mo             | 261                 | 8.1       | 422                       | 5.7                       | 17.8                            | 0.7                                                  | 8.6                               | -                                    | 1.21         | 0.53         |
|         | 8      | F   | 11  | 1yr 5mo             | 162                 | 7.8       | 520                       | 6.2                       | 27.5                            | 10.8                                                 | -                                 | -                                    | 2.62         | 4.22         |
|         | 9      | M   | 14  | 7yr 11mo            | 175                 | 7         | 496                       | 5.8                       | 21.8                            | 36                                                   | 9.8                               | -                                    | 0.776        | 2.51         |
|         | 10     | F   | 14  | 8yr 11mo            | 41                  | 7.2       | 435                       | 6.2                       | 26.9                            | 1.7                                                  | 18                                | 5.2                                  | 2.85         | 2.51         |
|         | 11     | M   | 15  | 14yr 7mo            | 88                  | 8.9       | 506                       | 5.3                       | 20.2                            | 18.5                                                 | -                                 | -                                    | 1.37         | 1.99         |
|         | 12     | F   | 15  | 6yr 2mo             | 64                  | 7.5       | 426                       | 5.8                       | 20.7                            | 101                                                  | < 0.4                             | -                                    | 2.59         | 4.18         |
|         | 13     | M   | 15  | 1yr 7mo             | 104                 | 5.9       | 511                       | 6.4                       | 22.8                            | 10.3                                                 | 11                                | -                                    | 1.97         | 2.9          |
|         | 14     | M   | 15  | 4yr 7mo             | 89                  | 7         | 504                       | 6.2                       | 24.6                            | 64                                                   | -                                 | -                                    | 2.35         | 3.73         |
|         | 15     | M   | 15  | 4yr 7mo             | 137                 | 6.3       | 550                       | 3.7                       | 18.1                            | 3.1                                                  | -                                 | -                                    | 2.66         | 12.2         |

<sup>1</sup>glutamic acid decarboxylase, <sup>2</sup>values on the diagnosis, <sup>3</sup>normal range < 1.5 U/ml, <sup>4</sup>normal range < 0.4 U/ml, <sup>5</sup>normal range < 125 nU/ml, <sup>6</sup>not determined
